# Supplementary material for: Long Non-Coding RNA Malat1 Increases the Rescuing Effect of Quercetin on TNFα-Impaired Bone Marrow Stem Cell Osteogenesis and Ovariectomy-Induced Osteoporosis
Source: MDPI journal article supplement (doi:10.3390/ijms24065965), 2023-03-22
Supplement: s1 [file s1]

**Supplementary Table S1. Primers used for construction and Real-time PCR vector assays**

| <b>Primers for Real-time PCR</b> |               |        |                                                      |                   |
|----------------------------------|---------------|--------|------------------------------------------------------|-------------------|
| Gene ID                          | Accession No. | F/R    | Sequence                                             | Product size (bp) |
| mRunx2                           | NM_001146038  | F<br>R | ACACCGTGTCTAGCAAAGC<br>GCTCACGTCGCTCATCTTG           | 99                |
| mAlp                             | NM_007431     | F<br>R | ACTGCGCTCCTTAGGGCT<br>GGCAGCGTCAGATGTTAATTG          | 104               |
| mOcn                             | NM_007541     | F<br>R | GGTAGTGAACAGACTCCGGC<br>CAAGCAGGGTTAAGCTCACA         | 96                |
| mH19                             | NR_130973     | F<br>R | CGGTGTGATGGAGAGGACAGAAG<br>CCAGAGAGCAGCAGGCAAGTGTTAG | 104               |
| mHotair                          | NR_047528     | F<br>R | CCTTATAAGCTCATCGGAGCA<br>CATTTCTGGGTGGTTCCTTT        | 92                |
| mDancr                           | NR_145131     | F<br>R | CCTCTCCCGGATGGCTGTAT<br>AGCCATTCAGTCACGGGTTT         | 162               |
| mMeg3                            | NR_003633     | F<br>R | GGACTTCACGCACAACACGTT<br>GTCCACGCAGGATTCCA           | 71                |
| mMalat1                          | NR_002847     | F<br>R | CCTAACGACTAGCATTGGCA<br>GCACTCTTTCCTGGGCTATC         | 168               |
| mGapdh                           | NM_001289726  | F<br>R | CGTCCCGTAGACAAAATGGT<br>TTGATGGCAACAATCTCCAC         | 110               |

“m” stands for “mouse”.

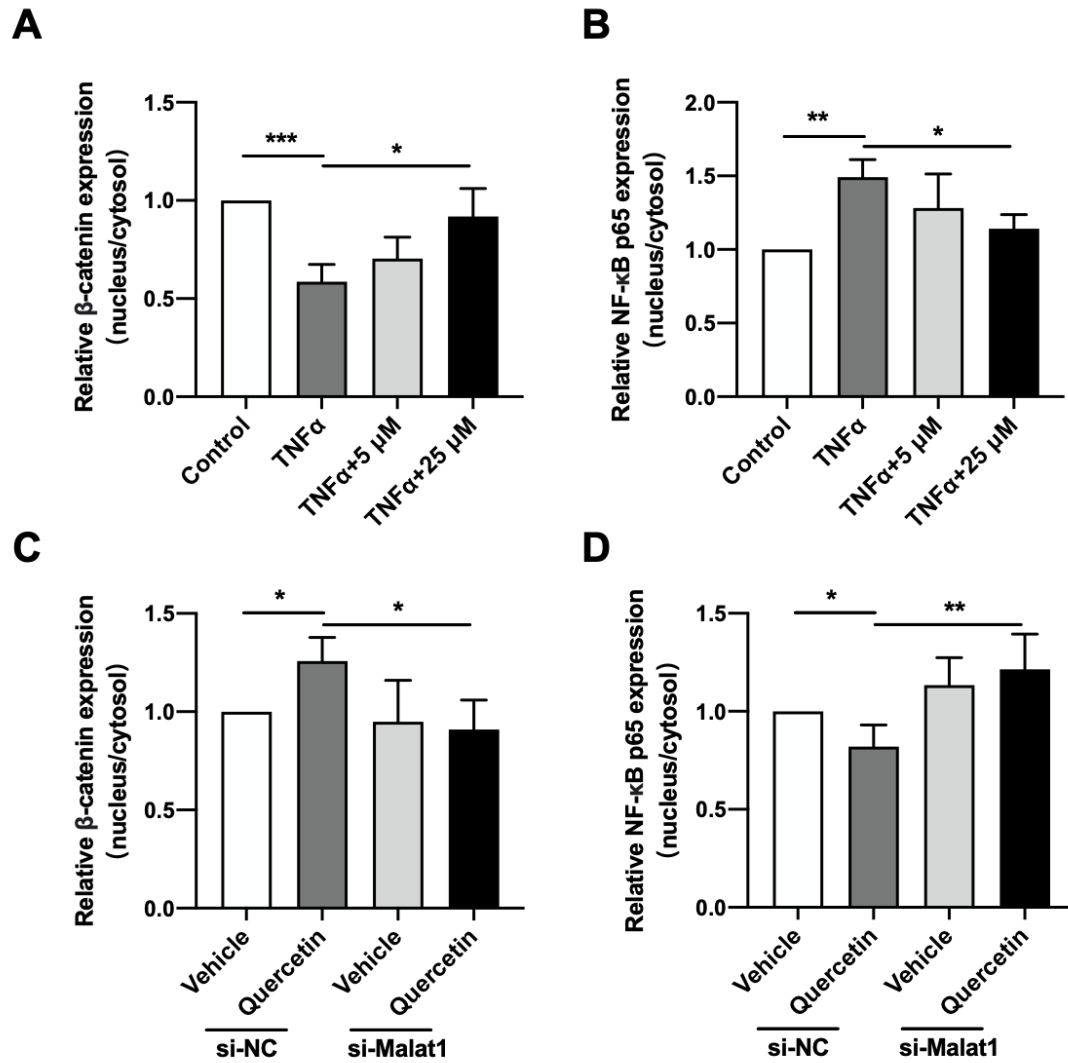

**Supplementary Figure S1. A-D.** Semi-quantitative analysis of all the Western blot bands in Figure 3A (A&B) and Figure 6A (C&D) (n=3; \*p<0.05, \*\*p<0.01, \*\*\*p<0.001).
